# Supplementary figures and images for: Benign solvents for recycling and re-use of a multi-layer battery pouch
Source: Royal Society of Chemistry journal article supplement (doi:10.1039/d2ma00239f), 2022-01-01

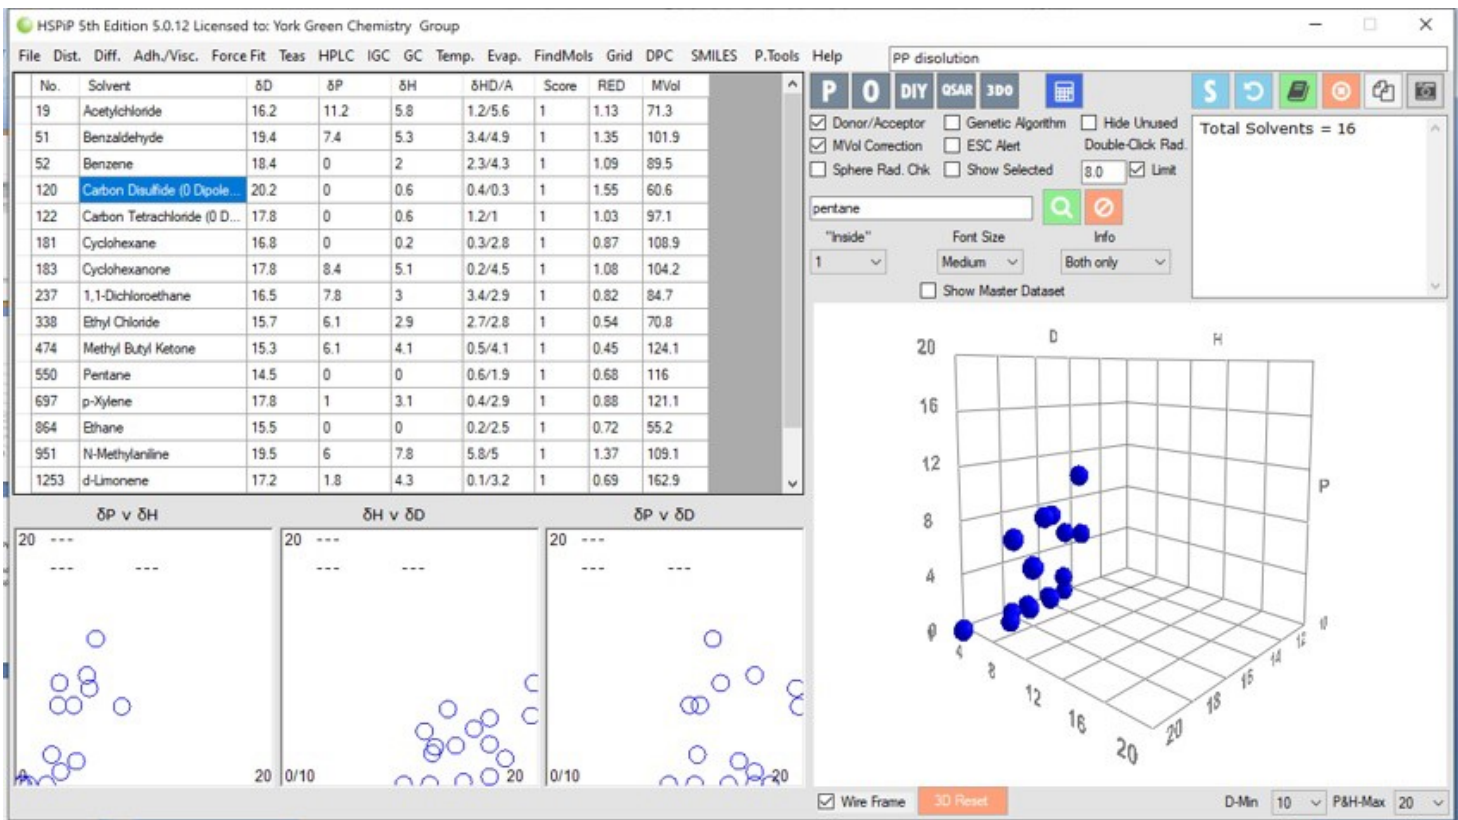

Supplement: d2ma00239f2.pdf [file d2ma00239f2.pdf]
